# Supplementary material for: Engineering a Microphysiological Model for Regenerative Endodontic Studies
Source: MDPI journal article supplement (doi:10.3390/biology13040221), 2024-03-28
Supplement: s1 [file s1]

Supplementary Figure S1

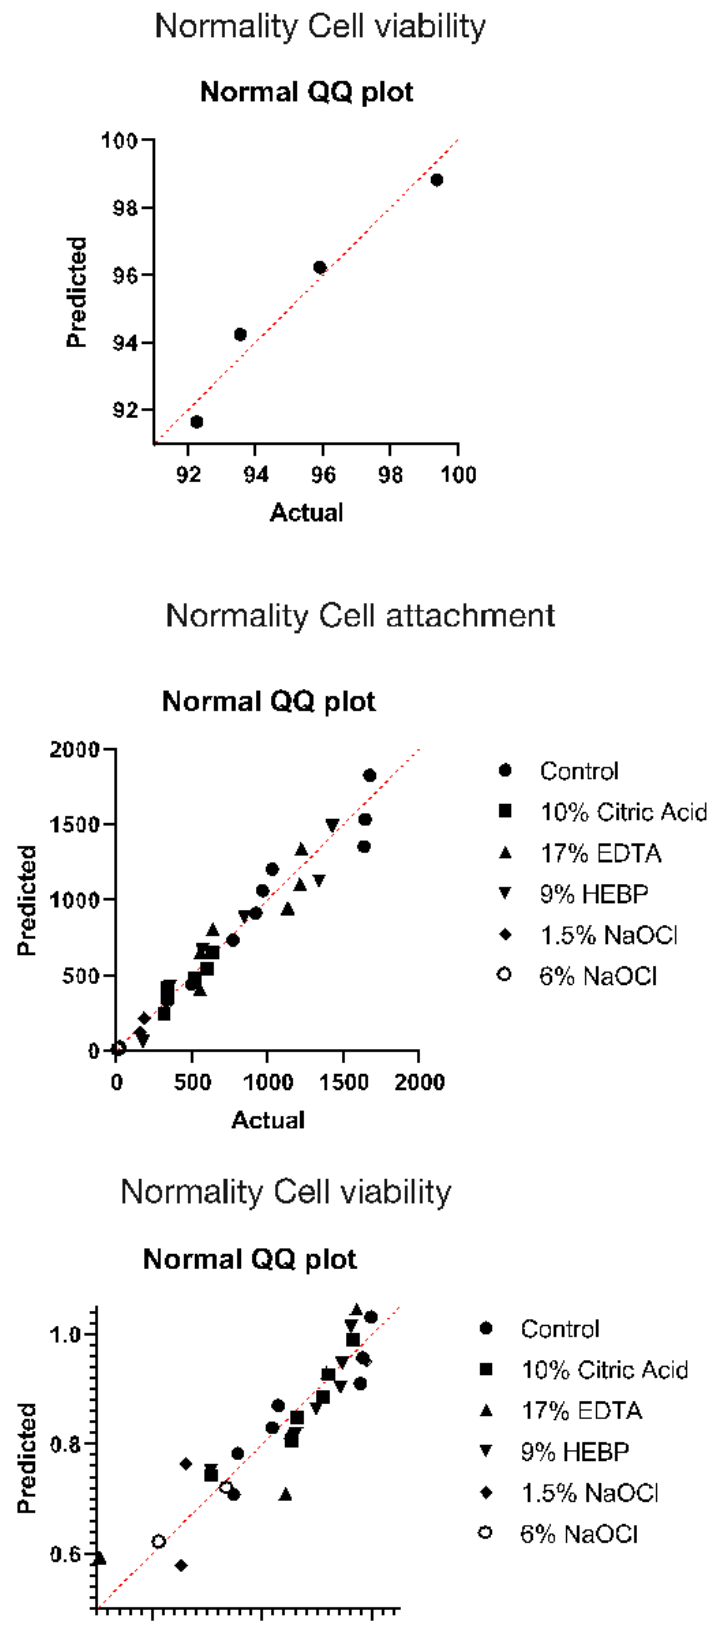

**Supplementary Figure S1.** Q-Q normal plots for 2D cell viability, 3D cell attachment and 3D cell viability.
